# Supplementary material
Source: PubMed Central journal article supplement (PMC5399127)

Supplementary Figure 1

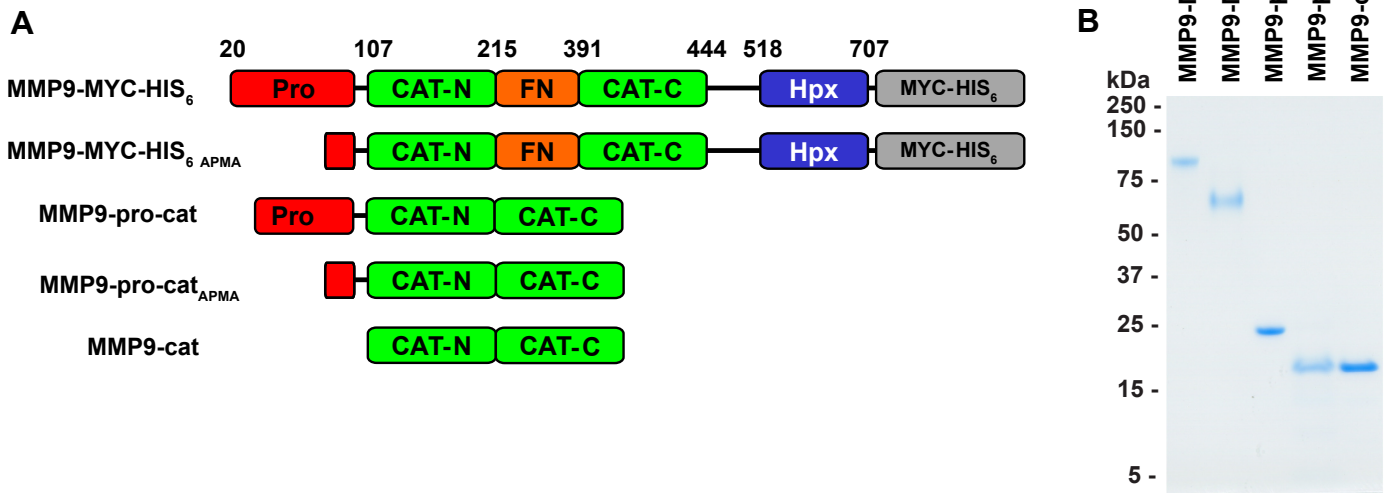

## Supplementary Figure 2

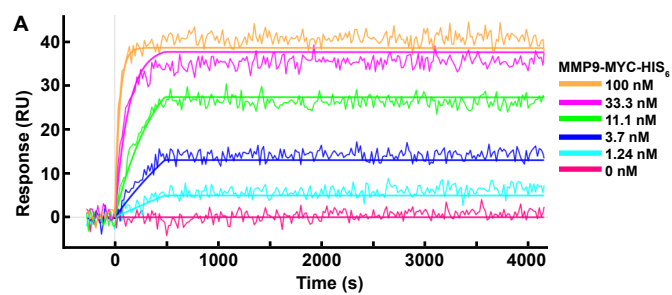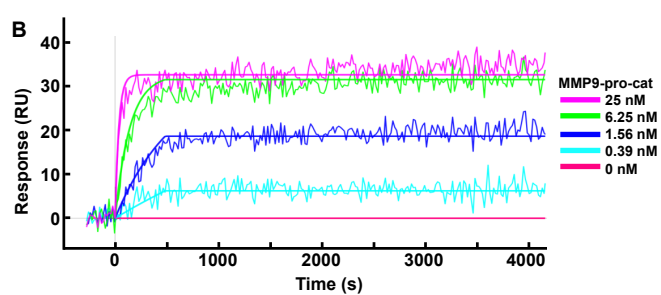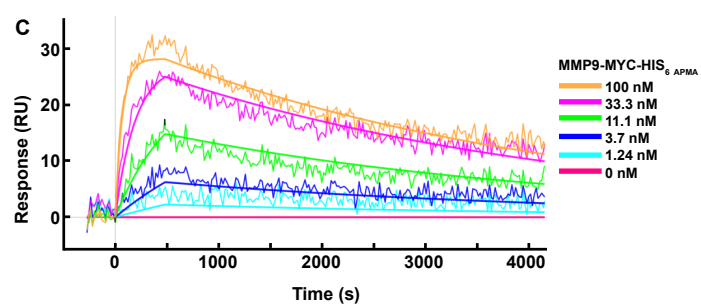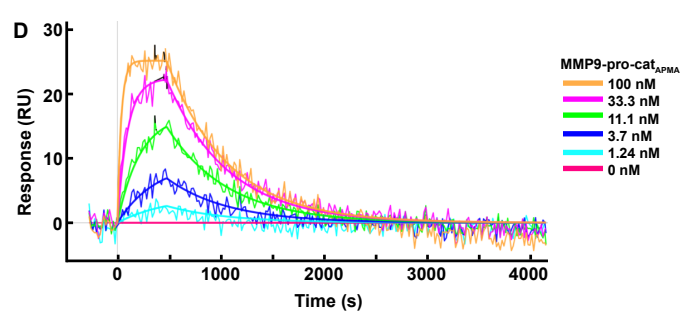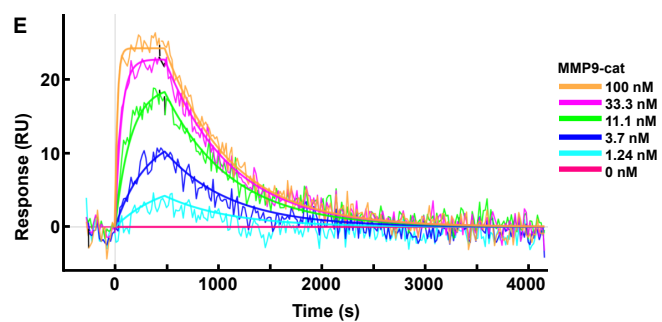

**F**

|                                | $k_{on}$ ( $M^{-1}s^{-1}$ )           | $k_{off}$ ( $s^{-1}$ )                      |
|--------------------------------|---------------------------------------|---------------------------------------------|
| MMP9-MYC-HIS <sub>6</sub>      | $2.4 \times 10^5 \pm 0.2 \times 10^5$ | $\leq 1 \times 10^{-5}$                     |
| MMP9-pro-cat                   | $1.2 \times 10^5 \pm 0.1 \times 10^6$ | $\leq 1 \times 10^{-5}$                     |
| MMP9-MYC-HIS <sub>6</sub> APMA | $1.6 \times 10^5 \pm 0.3 \times 10^4$ | $3.1 \times 10^{-4} \pm 0.4 \times 10^{-4}$ |
| MMP9-pro-cat <sub>APMA</sub>   | $3.6 \times 10^5 \pm 0.8 \times 10^5$ | $2.3 \times 10^{-3} \pm 0.5 \times 10^{-3}$ |
| MMP9-cat                       | $7.0 \times 10^5 \pm 2.1 \times 10^5$ | $2.3 \times 10^{-3} \pm 0.8 \times 10^{-3}$ |

Supplementary Figure 3

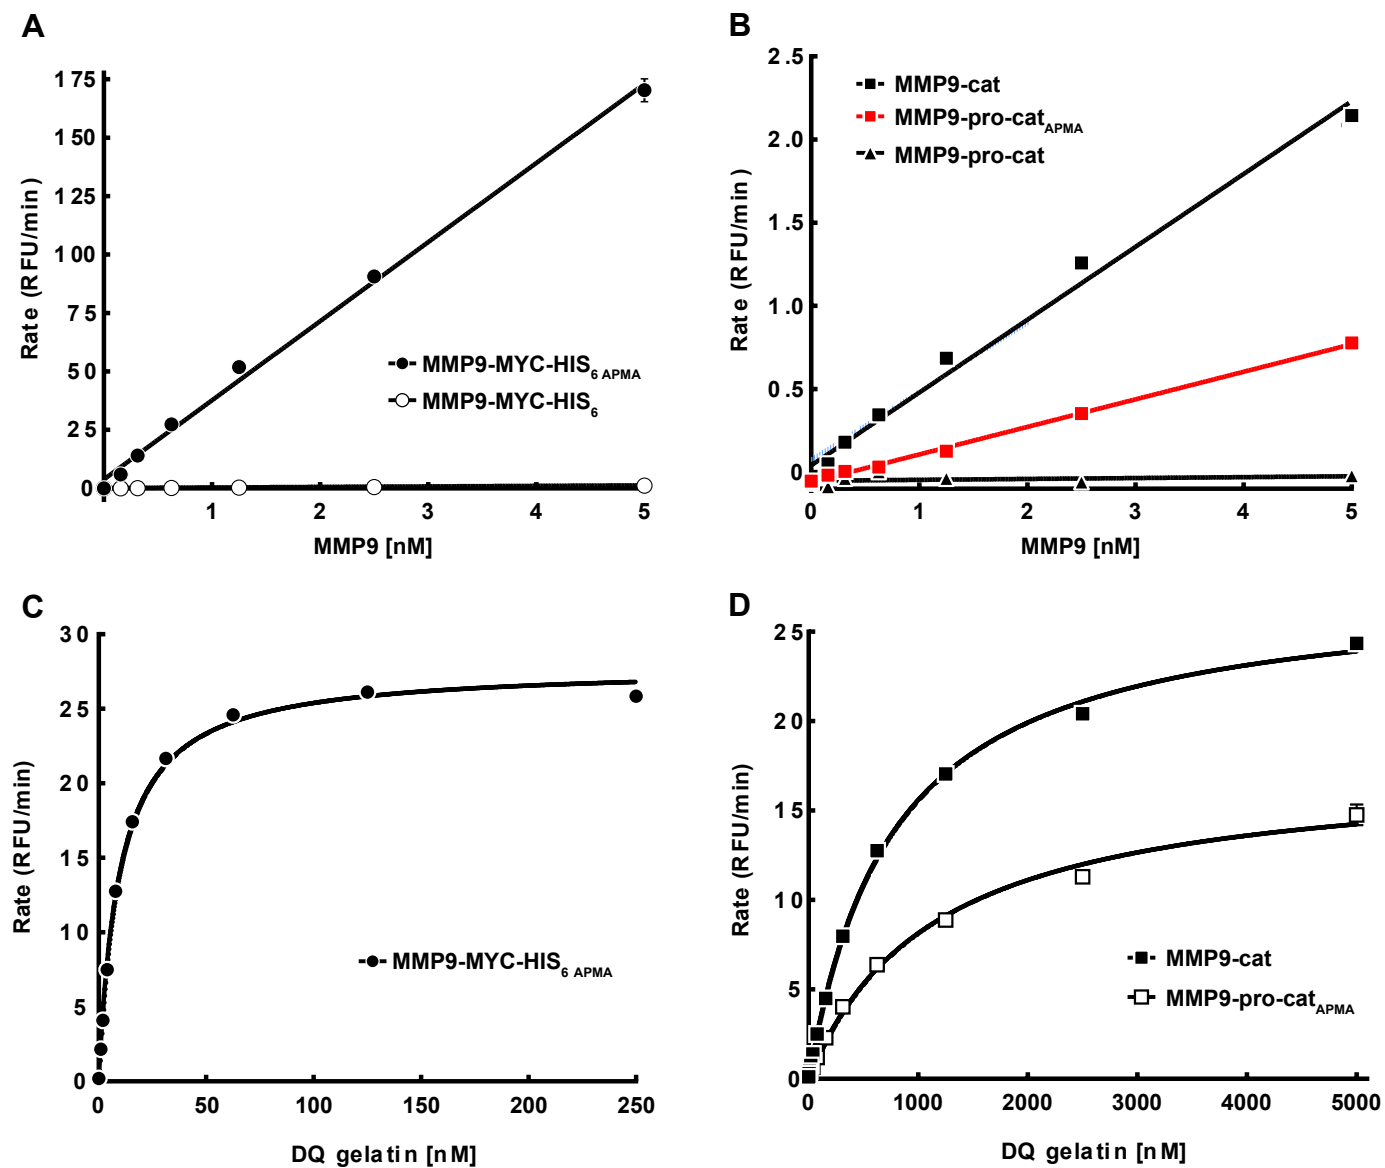

Supplementary Figure 4

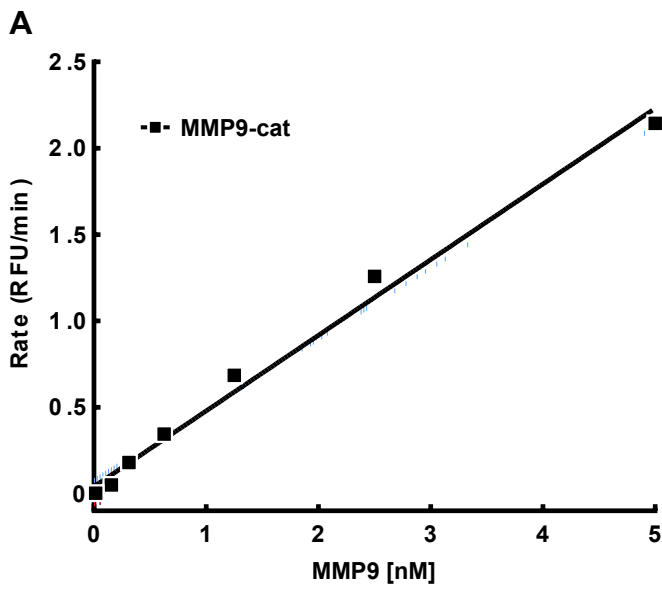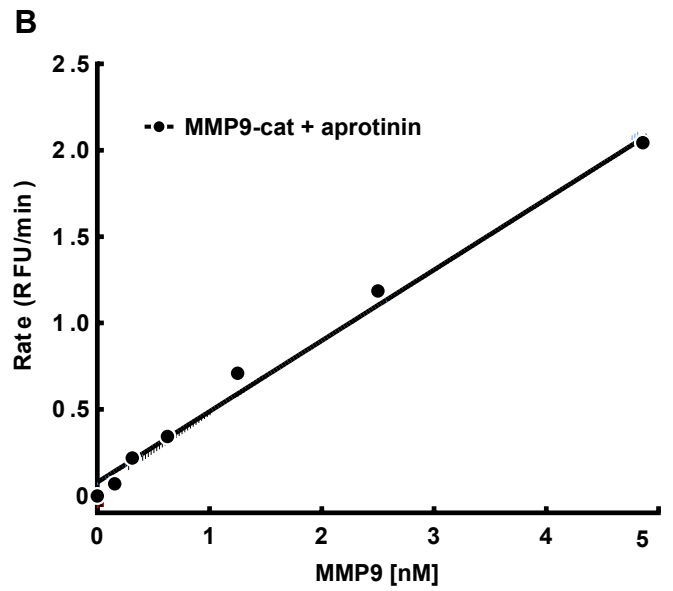



Supplementary Figure 5

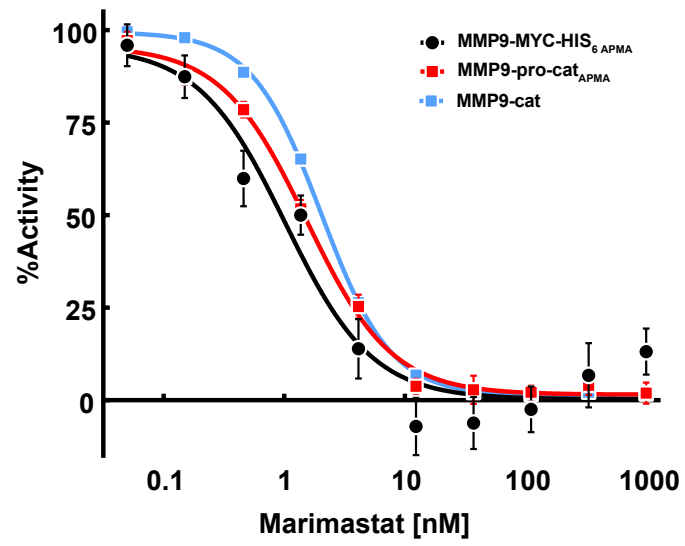

Supplementary Figure 6

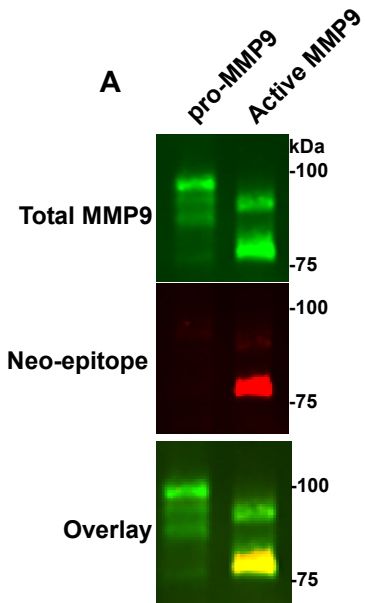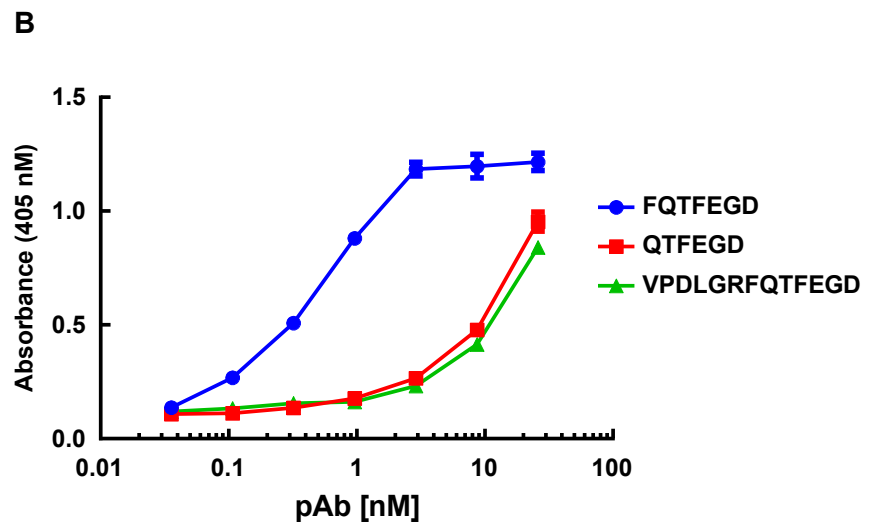

Supplementary Figure 7

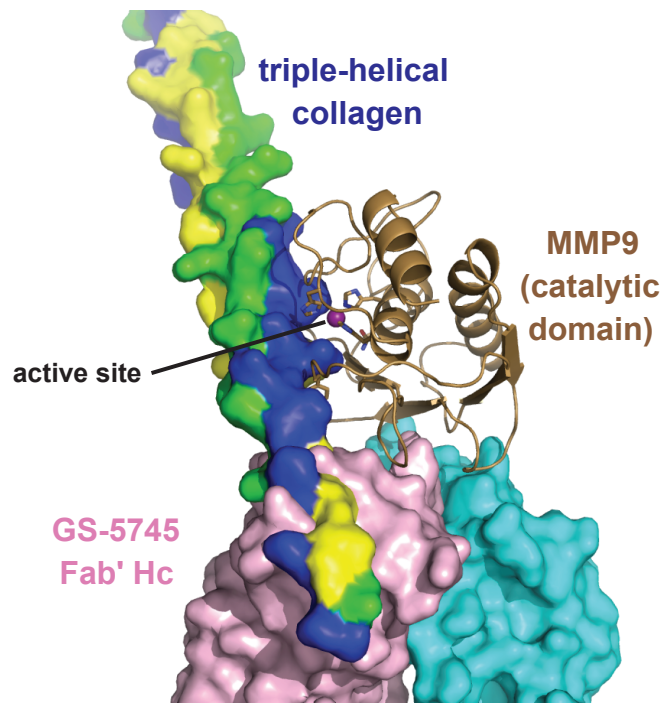

Supplement: 10.1074_M116.760579_jbc.M116.760579-1.pdf [file 10.1074_M116.760579_jbc.M116.760579-1.pdf]
